# Supplementary material for: Facile synthesis of noncytotoxic PEGylated dendrimer encapsulated silver sulfide quantum dots for NIR-II biological imaging
Source: Royal Society of Chemistry journal article supplement (doi:10.1039/c9nr10918h), 2020-01-01
Supplement: c9nr10918h1.pdf [file c9nr10918h1.pdf]

## Electronic Supporting Information

### Facile Synthesis of Noncytotoxic PEGylated Dendrimer Encapsulated Silver Sulfide

#### Quantum Dots for NIR-II Biological Imaging

Pragati Awasthi,<sup>a</sup> Xinyi An,<sup>b</sup> Jiajia Xiang,<sup>a</sup> Nagendra Kalva,<sup>a</sup> Youqing Shen,<sup>a\*</sup> and Chunyan Li,<sup>b\*</sup>

<sup>a</sup>Center for Bionanoengineering and Key Laboratory of Biomass Chemical Engineering of Ministry of Education, College of Chemical and Biological Engineering, Zhejiang University, Hangzhou, China 310027

<sup>b</sup>CAS Key Laboratory of Nano-Bio Interface, Division of Nanobiomedicine and *i*-Lab, Suzhou Institute of Nano-Tech and Nano-Bionics, Chinese Academy of Sciences, Suzhou, P.R. China 215123

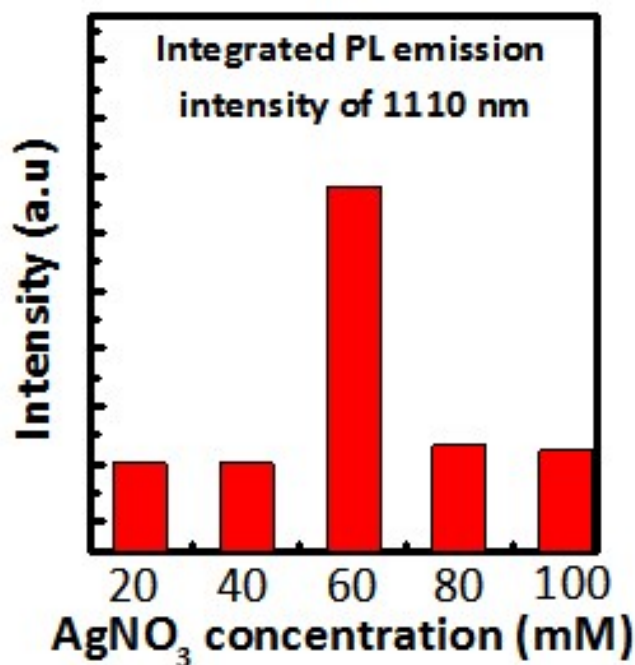

**Figure S1.** The integrated fluorescence emission intensity of the PEG-PATU Ag<sub>2</sub>S QDs formed at different AgNO<sub>3</sub> concentrations, 60  $\mu$ M PEG-PATU and 100 mM Na<sub>2</sub>S for 300 min reaction time.

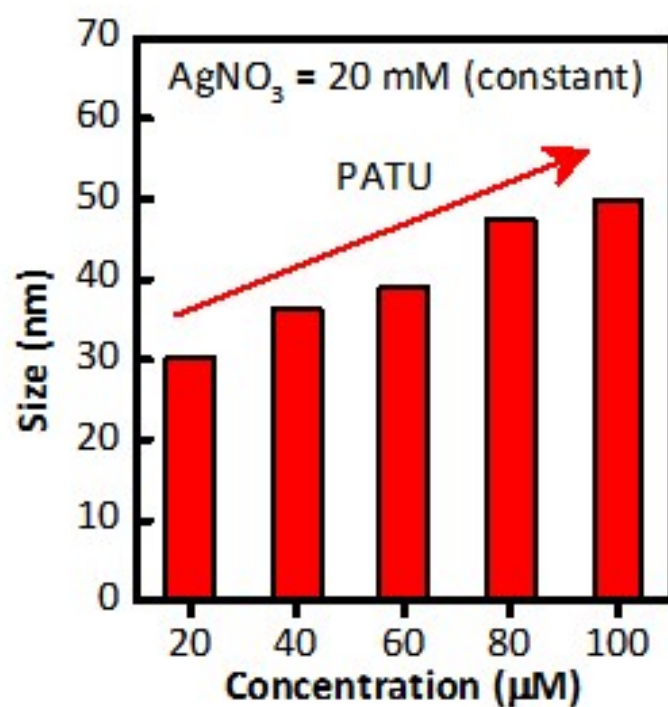

**Figure S2.** PEG-PATU Ag<sub>2</sub>S QDs size measured by DLS formed at different PEG-PATU concentrations, 20 mM AgNO<sub>3</sub> and 100 mM Na<sub>2</sub>S for 300 min reaction time.

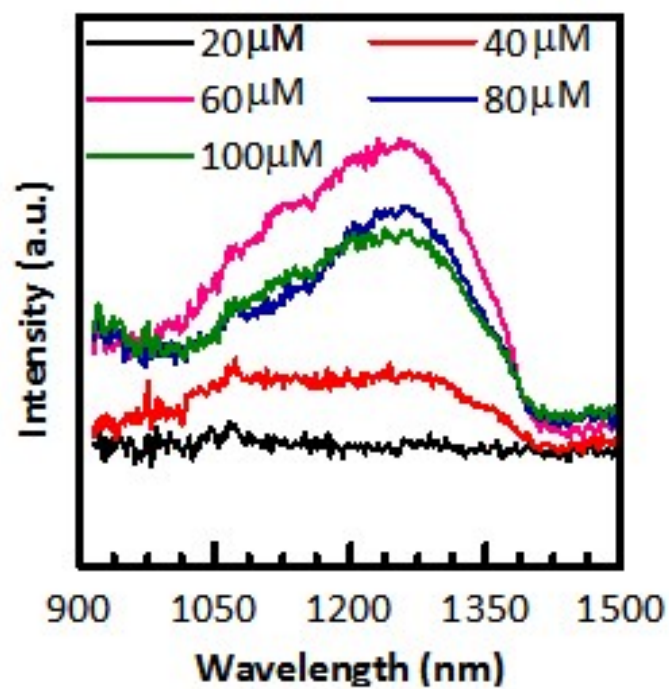

**Figure S3.** The fluorescence of the PEG-PATU Ag<sub>2</sub>S QDs formed at different PEG-PATU concentration, 20 mM AgNO<sub>3</sub> and 100 mM Na<sub>2</sub>S for 300 min reaction time.

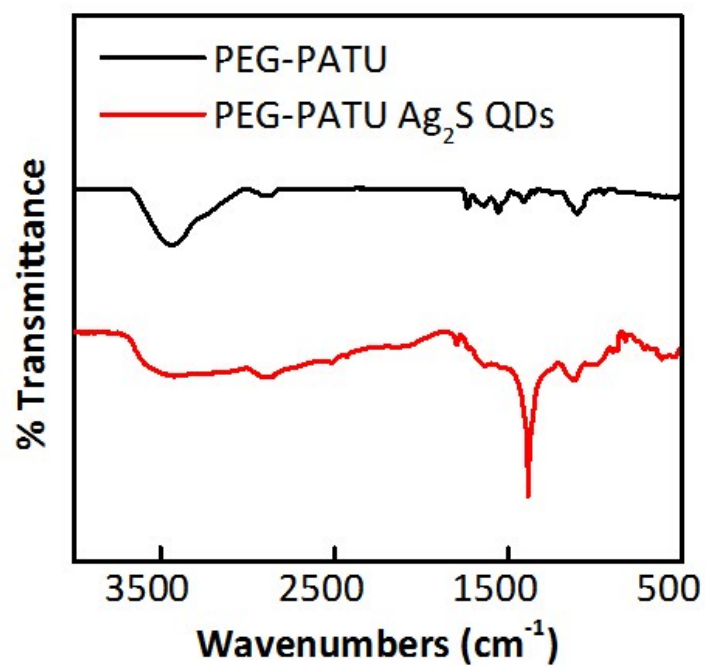

**Figure S4.** FT-IR spectrum of the PEG-PATU  $\text{Ag}_2\text{S}$  QDs.

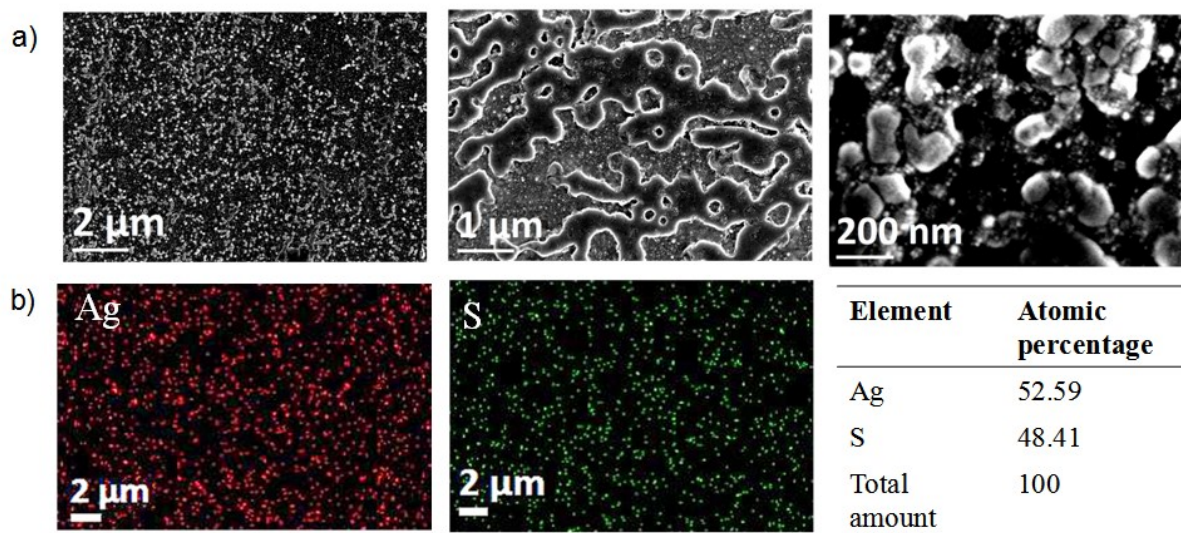

**Figure S5.** (a) Field emission scanning electron microscopy (FESEM) images of PEG-PATU  $\text{Ag}_2\text{S}$  QDs and (b) its corresponding EDS mapping images.

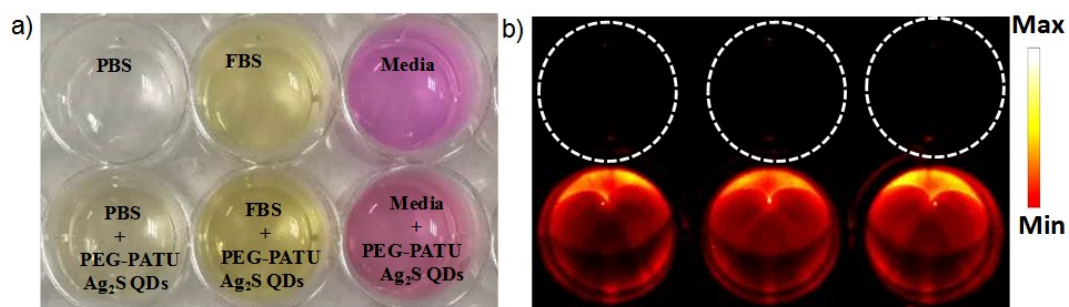

**Figure S6.** (a) The optical and (b) NIR-II fluorescent images (0.1 mg/ml) of PEG-PATU Ag<sub>2</sub>S QDs in PBS, fetal bovine serum (FBS) and cell culture medium (RPMI 1640) at room temperature.

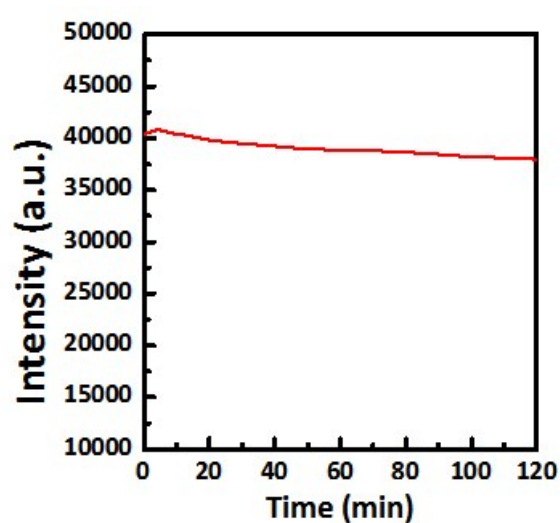

**Figure S7.** Stability of PEG-PATU Ag<sub>2</sub>S QDs. Fluorescence emission intensity of the PEG-PATU Ag<sub>2</sub>S QDs as-prepared with laser light irradiation (808 nm) for 120 min.

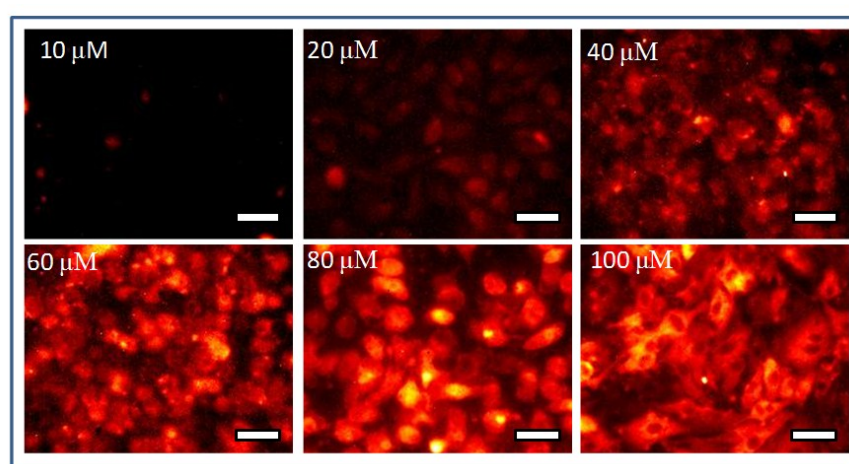

**Figure S8.** NIR-II fluorescence images of A549 cancer cells incubated for 4 h with different concentrations of PEG-PATU Ag<sub>2</sub>S QDs. Scale bar: 50  $\mu$ m.

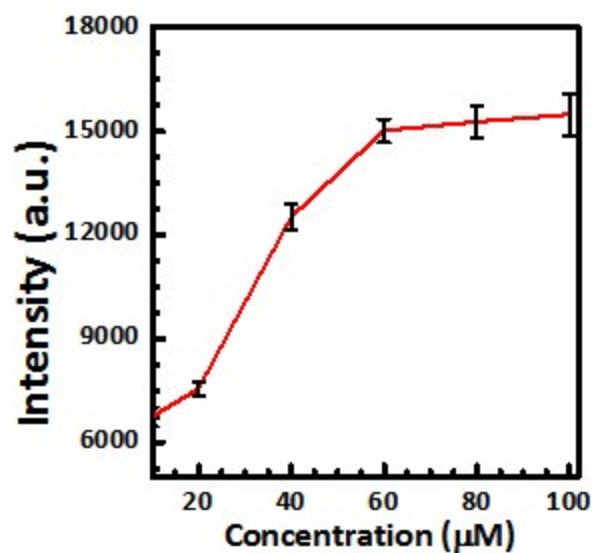

**Figure S9.** Fluorescence emission intensity of A549 cancer cells incubated with different concentrations of PEG-PATU Ag<sub>2</sub>S QDs for 4 h.

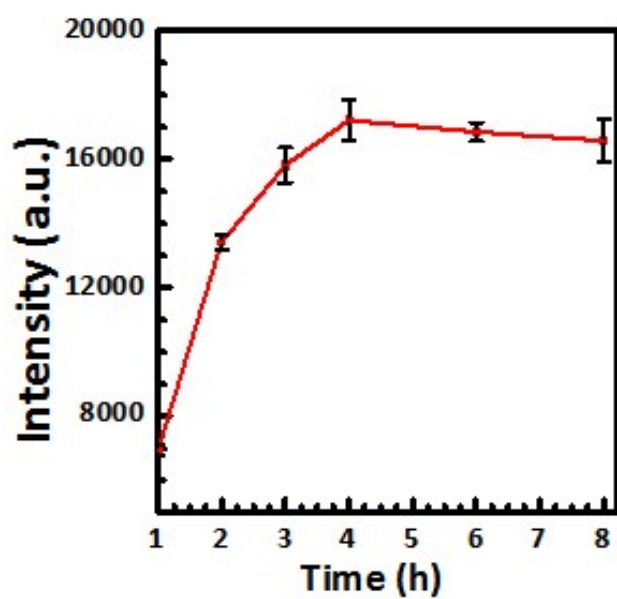

**Figure S10.** Fluorescence emission intensity of A549 cancer cells incubated with PEG-PATU Ag<sub>2</sub>S QDs (100 μM Ag<sub>2</sub>S) for different time points.

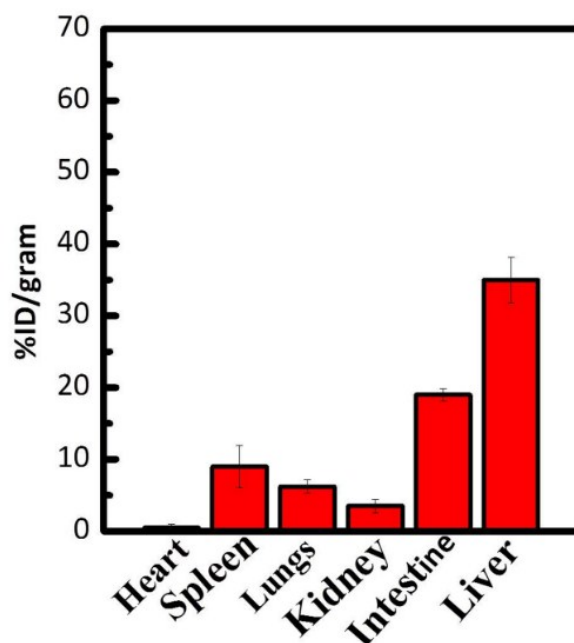

**Figure S11.** The biodistribution of PEG-PATU Ag<sub>2</sub>S QDs in various organs after 4 h of injection of A549 cancer cells incubated with PEG-PATU Ag<sub>2</sub>S QDs (100  $\mu$ M Ag<sub>2</sub>S) for 4 h. The (%ID/gram) denotes the percent injected dose per gram.

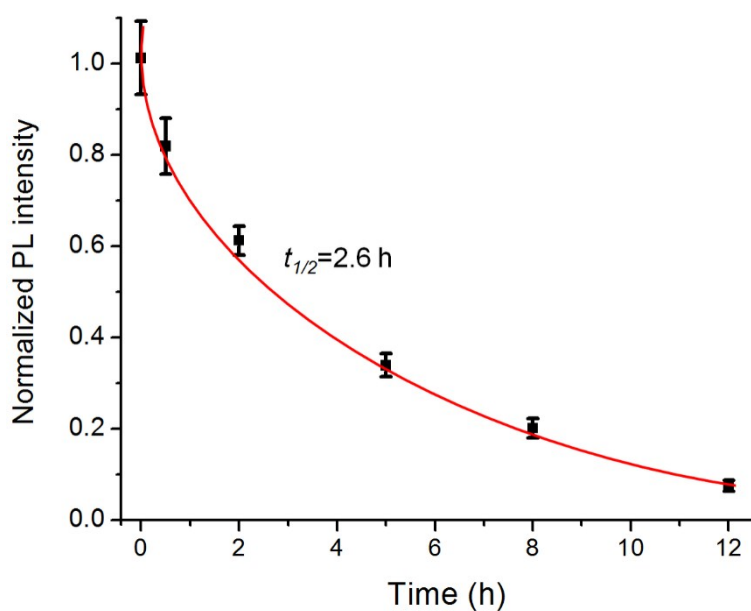

**Figure S12.** Blood retention study of PEG<sub>1000</sub>-PATU Ag<sub>2</sub>S QDs by NIR-II fluorescence imaging of the blood samples obtained at different time point.



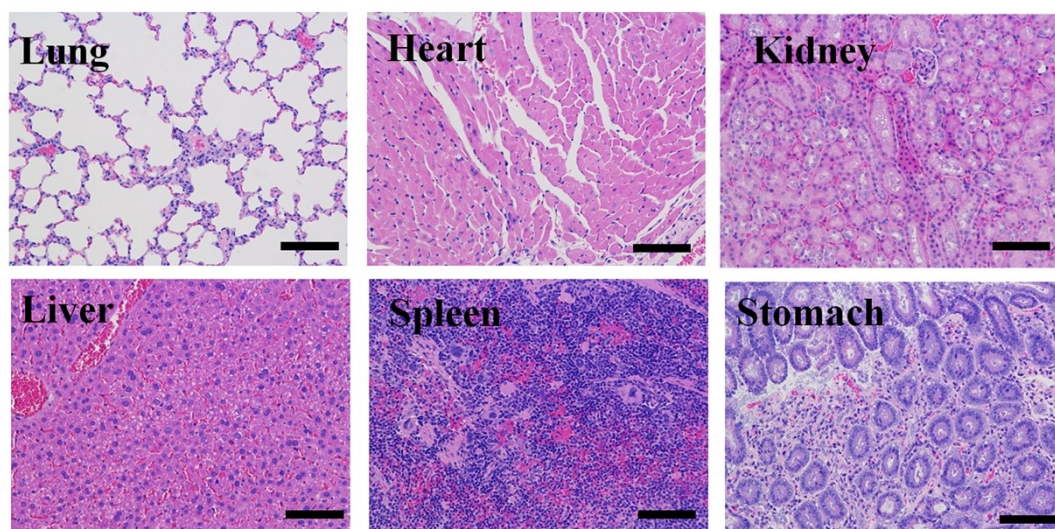

**Figure S13.** H&E- stained images of the major organs of the mouse after 24 h of intravenous injection of PEG-PATU Ag<sub>2</sub>S QDs (2 mg mL<sup>-1</sup> Ag<sub>2</sub>S, 100 μL). (Scale bar: 100 μm).
